# Supplementary material
Source: ML conference proceedings conference paper supplement (https://aclanthology.org/D11-1008)
Supplement: Attachment [file D11-1008.Attachment.gz]

Archive with 221 entries (214 files):
- ./._EMNLP11_Sangati_Zuidema
- EMNLP11_Sangati_Zuidema
- EMNLP11_Sangati_Zuidema/._.DS_Store
- EMNLP11_Sangati_Zuidema/.DS_Store
- EMNLP11_Sangati_Zuidema/._BitPar
- EMNLP11_Sangati_Zuidema/BitPar
- EMNLP11_Sangati_Zuidema/DoubleDOP.jar
- EMNLP11_Sangati_Zuidema/FragmentExtractor.jar
- EMNLP11_Sangati_Zuidema/fragments_approxFreq.txt
- EMNLP11_Sangati_Zuidema/README
- EMNLP11_Sangati_Zuidema/testExample.mrg
- EMNLP11_Sangati_Zuidema/treebankExample.mrg
- EMNLP11_Sangati_Zuidema/BitPar/._.DS_Store
- EMNLP11_Sangati_Zuidema/BitPar/.DS_Store
- EMNLP11_Sangati_Zuidema/BitPar/bitpar
- EMNLP11_Sangati_Zuidema/BitPar/._man1
- EMNLP11_Sangati_Zuidema/BitPar/man1
- EMNLP11_Sangati_Zuidema/BitPar/README
- EMNLP11_Sangati_Zuidema/BitPar/._src
- EMNLP11_Sangati_Zuidema/BitPar/src
- EMNLP11_Sangati_Zuidema/BitPar/._wordclass
- EMNLP11_Sangati_Zuidema/BitPar/wordclass
- EMNLP11_Sangati_Zuidema/BitPar/wordclass/._.DS_Store
- EMNLP11_Sangati_Zuidema/BitPar/wordclass/.DS_Store
- EMNLP11_Sangati_Zuidema/BitPar/wordclass/._compile.sh
- EMNLP11_Sangati_Zuidema/BitPar/wordclass/compile.sh
- EMNLP11_Sangati_Zuidema/BitPar/wordclass/._convert-automaton.perl
- EMNLP11_Sangati_Zuidema/BitPar/wordclass/convert-automaton.perl
- EMNLP11_Sangati_Zuidema/BitPar/wordclass/._Data
- EMNLP11_Sangati_Zuidema/BitPar/wordclass/Data
- EMNLP11_Sangati_Zuidema/BitPar/wordclass/._update-indices.perl
- EMNLP11_Sangati_Zuidema/BitPar/wordclass/update-indices.perl
- EMNLP11_Sangati_Zuidema/BitPar/wordclass/._wordclass.fst
- EMNLP11_Sangati_Zuidema/BitPar/wordclass/wordclass.fst
- EMNLP11_Sangati_Zuidema/BitPar/wordclass/Data/._JJ.cap
- EMNLP11_Sangati_Zuidema/BitPar/wordclass/Data/JJ.cap
- EMNLP11_Sangati_Zuidema/BitPar/wordclass/Data/._JJ.lc
- EMNLP11_Sangati_Zuidema/BitPar/wordclass/Data/JJ.lc
- EMNLP11_Sangati_Zuidema/BitPar/wordclass/Data/._JJ.uc
- EMNLP11_Sangati_Zuidema/BitPar/wordclass/Data/JJ.uc
- EMNLP11_Sangati_Zuidema/BitPar/wordclass/Data/._JJR.cap
- EMNLP11_Sangati_Zuidema/BitPar/wordclass/Data/JJR.cap
- EMNLP11_Sangati_Zuidema/BitPar/wordclass/Data/._JJR.lc
- EMNLP11_Sangati_Zuidema/BitPar/wordclass/Data/JJR.lc
- EMNLP11_Sangati_Zuidema/BitPar/wordclass/Data/._JJR.uc
- EMNLP11_Sangati_Zuidema/BitPar/wordclass/Data/JJR.uc
- EMNLP11_Sangati_Zuidema/BitPar/wordclass/Data/._JJS.cap
- EMNLP11_Sangati_Zuidema/BitPar/wordclass/Data/JJS.cap
- EMNLP11_Sangati_Zuidema/BitPar/wordclass/Data/._JJS.lc
- EMNLP11_Sangati_Zuidema/BitPar/wordclass/Data/JJS.lc
- EMNLP11_Sangati_Zuidema/BitPar/wordclass/Data/._JJS.uc
- EMNLP11_Sangati_Zuidema/BitPar/wordclass/Data/JJS.uc
- EMNLP11_Sangati_Zuidema/BitPar/wordclass/Data/._NN.cap
- EMNLP11_Sangati_Zuidema/BitPar/wordclass/Data/NN.cap
- EMNLP11_Sangati_Zuidema/BitPar/wordclass/Data/._NN.lc
- EMNLP11_Sangati_Zuidema/BitPar/wordclass/Data/NN.lc
- EMNLP11_Sangati_Zuidema/BitPar/wordclass/Data/._NN.uc
- EMNLP11_Sangati_Zuidema/BitPar/wordclass/Data/NN.uc
- EMNLP11_Sangati_Zuidema/BitPar/wordclass/Data/._NNS.cap
- EMNLP11_Sangati_Zuidema/BitPar/wordclass/Data/NNS.cap
- EMNLP11_Sangati_Zuidema/BitPar/wordclass/Data/._NNS.lc
- EMNLP11_Sangati_Zuidema/BitPar/wordclass/Data/NNS.lc
- EMNLP11_Sangati_Zuidema/BitPar/wordclass/Data/._NNS.uc
- EMNLP11_Sangati_Zuidema/BitPar/wordclass/Data/NNS.uc
- EMNLP11_Sangati_Zuidema/BitPar/wordclass/Data/._RB.cap
- EMNLP11_Sangati_Zuidema/BitPar/wordclass/Data/RB.cap
- EMNLP11_Sangati_Zuidema/BitPar/wordclass/Data/._RB.lc
- EMNLP11_Sangati_Zuidema/BitPar/wordclass/Data/RB.lc
- EMNLP11_Sangati_Zuidema/BitPar/wordclass/Data/._RB.uc
- EMNLP11_Sangati_Zuidema/BitPar/wordclass/Data/RB.uc
- EMNLP11_Sangati_Zuidema/BitPar/wordclass/Data/._RBR.cap
- EMNLP11_Sangati_Zuidema/BitPar/wordclass/Data/RBR.cap
- EMNLP11_Sangati_Zuidema/BitPar/wordclass/Data/._RBR.lc
- EMNLP11_Sangati_Zuidema/BitPar/wordclass/Data/RBR.lc
- EMNLP11_Sangati_Zuidema/BitPar/wordclass/Data/._RBR.uc
- EMNLP11_Sangati_Zuidema/BitPar/wordclass/Data/RBR.uc
- EMNLP11_Sangati_Zuidema/BitPar/wordclass/Data/._RBS.cap
- EMNLP11_Sangati_Zuidema/BitPar/wordclass/Data/RBS.cap
- EMNLP11_Sangati_Zuidema/BitPar/wordclass/Data/._RBS.lc
- EMNLP11_Sangati_Zuidema/BitPar/wordclass/Data/RBS.lc
- EMNLP11_Sangati_Zuidema/BitPar/wordclass/Data/._RBS.uc
- EMNLP11_Sangati_Zuidema/BitPar/wordclass/Data/RBS.uc
- EMNLP11_Sangati_Zuidema/BitPar/wordclass/Data/._VV.cap
- EMNLP11_Sangati_Zuidema/BitPar/wordclass/Data/VV.cap
- EMNLP11_Sangati_Zuidema/BitPar/wordclass/Data/._VV.lc
- EMNLP11_Sangati_Zuidema/BitPar/wordclass/Data/VV.lc
- EMNLP11_Sangati_Zuidema/BitPar/wordclass/Data/._VV.uc
- EMNLP11_Sangati_Zuidema/BitPar/wordclass/Data/VV.uc
- EMNLP11_Sangati_Zuidema/BitPar/wordclass/Data/._VVD.cap
- EMNLP11_Sangati_Zuidema/BitPar/wordclass/Data/VVD.cap
- EMNLP11_Sangati_Zuidema/BitPar/wordclass/Data/._VVD.lc
- EMNLP11_Sangati_Zuidema/BitPar/wordclass/Data/VVD.lc
- EMNLP11_Sangati_Zuidema/BitPar/wordclass/Data/._VVD.uc
- EMNLP11_Sangati_Zuidema/BitPar/wordclass/Data/VVD.uc
- EMNLP11_Sangati_Zuidema/BitPar/wordclass/Data/._VVG.cap
- EMNLP11_Sangati_Zuidema/BitPar/wordclass/Data/VVG.cap
- EMNLP11_Sangati_Zuidema/BitPar/wordclass/Data/._VVG.lc
- EMNLP11_Sangati_Zuidema/BitPar/wordclass/Data/VVG.lc
- EMNLP11_Sangati_Zuidema/BitPar/wordclass/Data/._VVG.uc
- EMNLP11_Sangati_Zuidema/BitPar/wordclass/Data/VVG.uc
- EMNLP11_Sangati_Zuidema/BitPar/wordclass/Data/._VVN.cap
- EMNLP11_Sangati_Zuidema/BitPar/wordclass/Data/VVN.cap
- EMNLP11_Sangati_Zuidema/BitPar/wordclass/Data/._VVN.lc
- EMNLP11_Sangati_Zuidema/BitPar/wordclass/Data/VVN.lc
- EMNLP11_Sangati_Zuidema/BitPar/wordclass/Data/._VVN.uc
- EMNLP11_Sangati_Zuidema/BitPar/wordclass/Data/VVN.uc
- EMNLP11_Sangati_Zuidema/BitPar/wordclass/Data/._VVP.cap
- EMNLP11_Sangati_Zuidema/BitPar/wordclass/Data/VVP.cap
- EMNLP11_Sangati_Zuidema/BitPar/wordclass/Data/._VVP.lc
- EMNLP11_Sangati_Zuidema/BitPar/wordclass/Data/VVP.lc
- EMNLP11_Sangati_Zuidema/BitPar/wordclass/Data/._VVP.uc
- EMNLP11_Sangati_Zuidema/BitPar/wordclass/Data/VVP.uc
- EMNLP11_Sangati_Zuidema/BitPar/wordclass/Data/._VVZ.cap
- EMNLP11_Sangati_Zuidema/BitPar/wordclass/Data/VVZ.cap
- EMNLP11_Sangati_Zuidema/BitPar/wordclass/Data/._VVZ.lc
- EMNLP11_Sangati_Zuidema/BitPar/wordclass/Data/VVZ.lc
- EMNLP11_Sangati_Zuidema/BitPar/wordclass/Data/._VVZ.uc
- EMNLP11_Sangati_Zuidema/BitPar/wordclass/Data/VVZ.uc
- EMNLP11_Sangati_Zuidema/BitPar/src/apply.C
- EMNLP11_Sangati_Zuidema/BitPar/src/apply.o
- EMNLP11_Sangati_Zuidema/BitPar/src/._baseparser.C
- EMNLP11_Sangati_Zuidema/BitPar/src/baseparser.C
- EMNLP11_Sangati_Zuidema/BitPar/src/._baseparser.h
- EMNLP11_Sangati_Zuidema/BitPar/src/baseparser.h
- EMNLP11_Sangati_Zuidema/BitPar/src/baseparser.o
- EMNLP11_Sangati_Zuidema/BitPar/src/._basic-functions.h
- EMNLP11_Sangati_Zuidema/BitPar/src/basic-functions.h
- EMNLP11_Sangati_Zuidema/BitPar/src/._bitop.C
- EMNLP11_Sangati_Zuidema/BitPar/src/bitop.C
- EMNLP11_Sangati_Zuidema/BitPar/src/._bitop.h
- EMNLP11_Sangati_Zuidema/BitPar/src/bitop.h
- EMNLP11_Sangati_Zuidema/BitPar/src/bitop.o
- EMNLP11_Sangati_Zuidema/BitPar/src/bitpar
- EMNLP11_Sangati_Zuidema/BitPar/src/._bitpar.C
- EMNLP11_Sangati_Zuidema/BitPar/src/bitpar.C
- EMNLP11_Sangati_Zuidema/BitPar/src/bitpar.o
- EMNLP11_Sangati_Zuidema/BitPar/src/estimate-freqs.C
- EMNLP11_Sangati_Zuidema/BitPar/src/estimate-freqs.o
- EMNLP11_Sangati_Zuidema/BitPar/src/._grammar.C
- EMNLP11_Sangati_Zuidema/BitPar/src/grammar.C
- EMNLP11_Sangati_Zuidema/BitPar/src/._grammar.h
- EMNLP11_Sangati_Zuidema/BitPar/src/grammar.h
- EMNLP11_Sangati_Zuidema/BitPar/src/grammar.o
- EMNLP11_Sangati_Zuidema/BitPar/src/lexicalize.C
- EMNLP11_Sangati_Zuidema/BitPar/src/lexicalize.o
- EMNLP11_Sangati_Zuidema/BitPar/src/lexicon.C
- EMNLP11_Sangati_Zuidema/BitPar/src/._lexicon.h
- EMNLP11_Sangati_Zuidema/BitPar/src/lexicon.h
- EMNLP11_Sangati_Zuidema/BitPar/src/lexicon.o
- EMNLP11_Sangati_Zuidema/BitPar/src/._Makefile
- EMNLP11_Sangati_Zuidema/BitPar/src/Makefile
- EMNLP11_Sangati_Zuidema/BitPar/src/._man1
- EMNLP11_Sangati_Zuidema/BitPar/src/man1
- EMNLP11_Sangati_Zuidema/BitPar/src/._nbest.C
- EMNLP11_Sangati_Zuidema/BitPar/src/nbest.C
- EMNLP11_Sangati_Zuidema/BitPar/src/nbest.o
- EMNLP11_Sangati_Zuidema/BitPar/src/._parser.C
- EMNLP11_Sangati_Zuidema/BitPar/src/parser.C
- EMNLP11_Sangati_Zuidema/BitPar/src/._parser.h
- EMNLP11_Sangati_Zuidema/BitPar/src/parser.h
- EMNLP11_Sangati_Zuidema/BitPar/src/parser.o
- EMNLP11_Sangati_Zuidema/BitPar/src/._po-apply.C
- EMNLP11_Sangati_Zuidema/BitPar/src/po-apply.C
- EMNLP11_Sangati_Zuidema/BitPar/src/po-apply.o
- EMNLP11_Sangati_Zuidema/BitPar/src/._print-YAP.h
- EMNLP11_Sangati_Zuidema/BitPar/src/print-YAP.h
- EMNLP11_Sangati_Zuidema/BitPar/src/._print.h
- EMNLP11_Sangati_Zuidema/BitPar/src/print.h
- EMNLP11_Sangati_Zuidema/BitPar/src/._prob.h
- EMNLP11_Sangati_Zuidema/BitPar/src/prob.h
- EMNLP11_Sangati_Zuidema/BitPar/src/process.C
- EMNLP11_Sangati_Zuidema/BitPar/src/process.o
- EMNLP11_Sangati_Zuidema/BitPar/src/._quote.C
- EMNLP11_Sangati_Zuidema/BitPar/src/quote.C
- EMNLP11_Sangati_Zuidema/BitPar/src/._quote.h
- EMNLP11_Sangati_Zuidema/BitPar/src/quote.h
- EMNLP11_Sangati_Zuidema/BitPar/src/quote.o
- EMNLP11_Sangati_Zuidema/BitPar/src/._retagging.C
- EMNLP11_Sangati_Zuidema/BitPar/src/retagging.C
- EMNLP11_Sangati_Zuidema/BitPar/src/._retagging.h
- EMNLP11_Sangati_Zuidema/BitPar/src/retagging.h
- EMNLP11_Sangati_Zuidema/BitPar/src/retagging.o
- EMNLP11_Sangati_Zuidema/BitPar/src/._scanner.C
- EMNLP11_Sangati_Zuidema/BitPar/src/scanner.C
- EMNLP11_Sangati_Zuidema/BitPar/src/._scanner.l
- EMNLP11_Sangati_Zuidema/BitPar/src/scanner.l
- EMNLP11_Sangati_Zuidema/BitPar/src/scanner.o
- EMNLP11_Sangati_Zuidema/BitPar/src/._string-set.h
- EMNLP11_Sangati_Zuidema/BitPar/src/string-set.h
- EMNLP11_Sangati_Zuidema/BitPar/src/._symbol-table.h
- EMNLP11_Sangati_Zuidema/BitPar/src/symbol-table.h
- EMNLP11_Sangati_Zuidema/BitPar/src/._traces.C
- EMNLP11_Sangati_Zuidema/BitPar/src/traces.C
- EMNLP11_Sangati_Zuidema/BitPar/src/._traces.h
- EMNLP11_Sangati_Zuidema/BitPar/src/traces.h
- EMNLP11_Sangati_Zuidema/BitPar/src/traces.o
- EMNLP11_Sangati_Zuidema/BitPar/src/._tree.C
- EMNLP11_Sangati_Zuidema/BitPar/src/tree.C
- EMNLP11_Sangati_Zuidema/BitPar/src/._tree.h
- EMNLP11_Sangati_Zuidema/BitPar/src/tree.h
- EMNLP11_Sangati_Zuidema/BitPar/src/tree.o
- EMNLP11_Sangati_Zuidema/BitPar/src/._tree.y
- EMNLP11_Sangati_Zuidema/BitPar/src/tree.y
- EMNLP11_Sangati_Zuidema/BitPar/src/._vitparser.C
- EMNLP11_Sangati_Zuidema/BitPar/src/vitparser.C
- EMNLP11_Sangati_Zuidema/BitPar/src/._vitparser.h
- EMNLP11_Sangati_Zuidema/BitPar/src/vitparser.h
- EMNLP11_Sangati_Zuidema/BitPar/src/vitparser.o
- EMNLP11_Sangati_Zuidema/BitPar/src/._wordclass.C
- EMNLP11_Sangati_Zuidema/BitPar/src/wordclass.C
- EMNLP11_Sangati_Zuidema/BitPar/src/._wordclass.h
- EMNLP11_Sangati_Zuidema/BitPar/src/wordclass.h
- EMNLP11_Sangati_Zuidema/BitPar/src/wordclass.o
- EMNLP11_Sangati_Zuidema/BitPar/src/._y.tab.h
- EMNLP11_Sangati_Zuidema/BitPar/src/y.tab.h
- EMNLP11_Sangati_Zuidema/BitPar/src/man1/._bitpar.1
- EMNLP11_Sangati_Zuidema/BitPar/src/man1/bitpar.1
- EMNLP11_Sangati_Zuidema/BitPar/man1/._bitpar.1
- EMNLP11_Sangati_Zuidema/BitPar/man1/bitpar.1
- EMNLP11_Sangati_Zuidema/BitPar/man1/bitpar.pdf
- EMNLP11_Sangati_Zuidema/BitPar/man1/bitpar.ps
