# Supplementary material
Source: ML conference proceedings conference paper supplement (https://aclanthology.org/D11-1008)
Supplement: Attachment [file D11-1008.Attachment.gz › EMNLP11_Sangati_Zuidema/BitPar/wordclass/compile.sh]

#!/bin/sh

perl update-indices.perl wordclass.fst
fst-compiler wordclass.fst wordclass.a
fst-print wordclass.a | perl convert-automaton.perl > wordclass.txt
