# Supplementary material
Source: ML conference proceedings conference paper supplement (https://aclanthology.org/D11-1008)
Supplement: Attachment [file D11-1008.Attachment.gz › EMNLP11_Sangati_Zuidema/BitPar/wordclass/Data/JJ.uc]

ABLE
ACADEMIC
ACCEPTABLE
ACTIVE
ACTUAL
ADDITIONAL
ADEQUATE
ADJUSTABLE
ADJUSTED
ADMINISTRATIVE
ADVANCED
ADVERSE
ADVISORY
AFFECTED
AFFLUENT
AFRAID
AGGRESSIVE
AGRICULTURAL
ALIVE
ALLEGED
ALTERNATIVE
AMBITIOUS
ANGRY
ANNUAL
ANTICIPATED
ANTITRUST
ANXIOUS
APPARENT
APPELLATE
APPROPRIATE
ASSISTANT
ASSOCIATE
ATTRACTIVE
AUTOMATIC
AUTOMOTIVE
AVAILABLE
AVERAGE
AWARE
AWFUL
BACK
BAD
BASE
BASIC
BEARISH
BENCHMARK
BENEFICIAL
BIG
BIPARTISAN
BITTER
BLACK
BLEAK
BLUE
BOLD
BOTTOM
BRIEF
BRIGHT
BRISK
BROAD
BROKEN
BULLISH
BUREAUCRATIC
BUSY
CAPABLE
CAREFUL
CATASTROPHIC
CAUTIOUS
CELLULAR
CENTRAL
CERTAIN
CHEAP
CHEMICAL
CHIEF
CIVIL
CLASSIC
CLEAR
CLINICAL
CLOSE
CLOSED
COLD
COLLECTIVE
COMBINED
COMFORTABLE
COMIC
COMING
COMMERCIAL
COMMITTED
COMMON
COMPARABLE
COMPETITIVE
COMPLETE
COMPLEX
COMPOSITE
COMPREHENSIVE
CONCERNED
CONCRETE
CONFIDENT
CONGRESSIONAL
CONSECUTIVE
CONSERVATIVE
CONSIDERABLE
CONSISTENT
CONSOLIDATED
CONSTANT
CONSTITUTIONAL
CONTINUED
CONTROVERSIAL
CONVENTIONAL
CONVERTIBLE
COOPERATIVE
CORE
CORPORATE
CORRECT
COSTLY
COVERT
CRAZY
CREATIVE
CRIMINAL
CRITICAL
CRUCIAL
CRUDE
CUBIC
CULTURAL
CUMULATIVE
CURRENT
CYCLICAL
DAILY
DAMAGED
DANGEROUS
DARK
DEAD
DECENT
DEEP
DEFECTIVE
DEFENSIVE
DEFINITIVE
DEMOCRATIC
DEPENDENT
DEPRESSED
DEPUTY
DERIVATIVE
DESIRABLE
DETAILED
DIFFERENT
DIFFICULT
DIRECT
DISAPPOINTING
DISMAL
DISPOSABLE
DISSIDENT
DIVERSIFIED
DOMESTIC
DOMINANT
DOUBLE
DOWN
DOWNWARD
DRAMATIC
DUAL
DUE
DURABLE
EAGER
EARLY
EASY
ECONOMIC
EDUCATIONAL
EFFECTIVE
EFFICIENT
ELDERLY
ELECTRIC
ELECTRICAL
ELECTRONIC
ELIGIBLE
ELSE
EMOTIONAL
ENORMOUS
ENOUGH
ENTIRE
ENVIRONMENTAL
EQUAL
EQUIVALENT
ESSENTIAL
ESTIMATED
EVENTUAL
EVIDENT
EXACT
EXCELLENT
EXCESS
EXCESSIVE
EXCITING
EXCLUSIVE
EXECUTIVE
EXERCISABLE
EXISTING
EXPECTED
EXPENSIVE
EXTENSIVE
EXTRA
EXTRAORDINARY
EXTREME
FAIR
FALSE
FAMILIAR
FAMOUS
FANCY
FAST
FAT
FAVORABLE
FAVORITE
FEDERAL
FELLOW
FEW
FINAL
FINANCIAL
FINE
FIRM
FIRST
FISCAL
FIXED
FLAT
FLEXIBLE
FOLLOWING
FOREIGN
FORMAL
FORMER
FOURTH
FRAUDULENT
FREE
FREQUENT
FRESH
FRIENDLY
FRONT
FULL
FUNDAMENTAL
FUNNY
FURTHER
FUTURE
GENERAL
GENEROUS
GENETIC
GENUINE
GIANT
GLOBAL
GOLD
GOLDEN
GOOD
GRAND
GRAY
GREAT
GREEN
GROSS
GUILTY
HALF
HAPPY
HARD
HEALTHY
HEAVY
HEFTY
HELD
HIGH
HISTORICAL
HOSTILE
HOT
HUGE
HUMAN
HYBRID
IDLE
ILLEGAL
IMMEDIATE
IMMINENT
IMMUNE
IMPORTANT
IMPOSSIBLE
IMPRESSIVE
IMPROVED
INADEQUATE
INCREASED
INDEPENDENT
INDIVIDUAL
INDUSTRIAL
INDUSTRYWIDE
INEFFICIENT
INFLUENTIAL
INFORMAL
INITIAL
INSOLVENT
INSTITUTIONAL
INSURED
INTACT
INTEGRATED
INTENSE
INTERESTED
INTERESTING
INTERIM
INTERNAL
INTERNATIONAL
INTERSTATE
INTIMATE
INVOLVED
IRRESPONSIBLE
JOINT
JUDICIAL
KEY
LACKLUSTER
LARGE
LAST
LATE
LATER
LATTER
LEAD
LEADING
LEGAL
LEGISLATIVE
LEGITIMATE
LENGTHY
LEVERAGED
LIBERAL
LIGHT
LIKE
LIKELY
LIMITED
LIQUID
LITTLE
LIVE
LOCAL
LONG
LONGSTANDING
LONGTIME
LOOSE
LOW
LOYAL
LUCKY
LUCRATIVE
MAGNETIC
MAIN
MAJOR
MALE
MANDATORY
MANY
MARGINAL
MASSIVE
MAXIMUM
MAYORAL
MEDICAL
MERE
METRIC
METROPOLITAN
MIDDLE
MILITARY
MINIMAL
MINIMUM
MINOR
MISLEADING
MIXED
MODERATE
MODERN
MODEST
MONETARY
MONTHLY
MORAL
MUCH
MULTIPLE
MUNICIPAL
MUSICAL
MUTUAL
NARROW
NATIONAL
NATIONWIDE
NATURAL
NAVAL
NEAR
NEARBY
NECESSARY
NEGATIVE
NEGOTIABLE
NERVOUS
NET
NEW
NEXT
NICE
NOMINAL
NONCALLABLE
NORMAL
NORTHERN
NUCLEAR
NUMEROUS
OBVIOUS
ODD
OFFICIAL
OLD
ONGOING
ONLY
OPEN
OPERATIONAL
OPPOSITE
OPTICAL
OPTIMISTIC
ORDINARY
ORIGINAL
OTHER
OUTSIDE
OUTSTANDING
OVERALL
OVERNIGHT
OVERSEAS
OVERWHELMING
OWN
PAINFUL
PAR
PARLIAMENTARY
PARTIAL
PARTICULAR
PAST
PAYABLE
PERFECT
PERMANENT
PERSISTENT
PERSONAL
PESSIMISTIC
PHARMACEUTICAL
PHYSICAL
PLANNED
PLASTIC
PLEASED
POLITICAL
POOR
POPULAR
PORTABLE
POSITIVE
POSSIBLE
POTENTIAL
POWERFUL
PRACTICAL
PRECIOUS
PREFERRED
PREGNANT
PRELIMINARY
PREPARED
PRESENT
PRESIDENTIAL
PRETAX
PREVIOUS
PRIMARY
PRIME
PRINCIPAL
PRIOR
PRIVATE
PROCEDURAL
PROFESSIONAL
PROFITABLE
PROMINENT
PROMOTIONAL
PROPER
PROPOSED
PROSPECTIVE
PROVISIONAL
PSYCHOLOGICAL
PUBLIC
PURE
QUARTERLY
QUICK
QUIET
RACIAL
RADICAL
RANDOM
RAPID
RARE
RATIONAL
RAW
READY
REAL
REALISTIC
REASONABLE
RECENT
RECKLESS
RECORD
RED
REDUCED
REGIONAL
REGULAR
REGULATORY
RELATED
RELATIVE
RELEVANT
RELUCTANT
REMARKABLE
REQUIRED
RESIDENTIAL
RESPONSIBLE
RETAIL
REVISED
RICH
RIDICULOUS
RIGHT
RIGID
RISKY
RIVAL
ROBUST
ROUGH
ROUTINE
RURAL
SAFE
SALES
SAME
SCIENTIFIC
SEASONAL
SECOND
SECONDARY
SECRET
SECURED
SENIOR
SENSITIVE
SEPARATE
SERIOUS
SEVERAL
SEVERE
SHARP
SHORT
SICK
SIGNIFICANT
SIMILAR
SIMPLE
SINGLE
SIXTH
SIZABLE
SKEPTICAL
SLIGHT
SLOW
SLUGGISH
SMALL
SMART
SOCIAL
SOCIALIST
SOFT
SOLE
SOLID
SOPHISTICATED
SOUND
SOUR
SOUTHERN
SPECIAL
SPECIFIC
SQUARE
STABLE
STANDARD
STATISTICAL
STEADY
STEEP
STIFF
STRAIGHT
STRANGE
STRATEGIC
STRICT
STRIKING
STRONG
STRUCTURAL
SUBJECT
SUBORDINATED
SUBSEQUENT
SUBSTANTIAL
SUBURBAN
SUCCESSFUL
SUCH
SUDDEN
SUFFICIENT
SUPERIOR
SURE
SURPRISED
SURPRISING
SWEEPING
SWEET
TAXABLE
TECHNICAL
TEMPORARY
TENTATIVE
TERRIBLE
THIN
THIRD
TIGHT
TINY
TOP
TOTAL
TOUGH
TRADITIONAL
TREMENDOUS
TROUBLED
TRUE
TYPICAL
ULTIMATE
UNABLE
UNAVAILABLE
UNCERTAIN
UNCHANGED
UNCLEAR
UNDERLYING
UNDISCLOSED
UNEXPECTED
UNFAIR
UNIVERSAL
UNLIKELY
UNNECESSARY
UNPRECEDENTED
UNRELATED
UNSECURED
UNSPECIFIED
UNSUCCESSFUL
UNUSUAL
UPPER
UPSCALE
URBAN
USEFUL
USUAL
VACANT
VALID
VALUABLE
VARIOUS
VAST
VERY
VIABLE
VIGOROUS
VISIBLE
VOLATILE
VULNERABLE
WARM
WARY
WEAK
WEALTHY
WEEKLY
WESTERN
WHITE
WHOLE
WHOLESALE
WIDE
WIDESPREAD
WILD
WILLING
WORRIED
WORTH
WRONG
YOUNG
