# Supplementary material
Source: ML conference proceedings conference paper supplement (https://aclanthology.org/D11-1008)
Supplement: Attachment [file D11-1008.Attachment.gz › EMNLP11_Sangati_Zuidema/BitPar/wordclass/Data/JJR.cap]

Better
Bigger
Broader
Cheaper
Closer
Deeper
Earlier
Easier
Faster
Fewer
Greater
Harder
Higher
Larger
Less
Longer
Lower
More
Newer
Older
Safer
Slower
Smaller
Softer
Stronger
Tougher
Weaker
Wider
Worse
Younger
