# Supplementary material
Source: ML conference proceedings conference paper supplement (https://aclanthology.org/D11-1008)
Supplement: Attachment [file D11-1008.Attachment.gz › EMNLP11_Sangati_Zuidema/BitPar/wordclass/Data/JJR.lc]

better
bigger
broader
cheaper
closer
deeper
earlier
easier
faster
fewer
greater
harder
higher
larger
less
longer
lower
more
newer
older
safer
slower
smaller
softer
stronger
tougher
weaker
wider
worse
younger
