# Supplementary material
Source: ML conference proceedings conference paper supplement (https://aclanthology.org/D11-1008)
Supplement: Attachment [file D11-1008.Attachment.gz › EMNLP11_Sangati_Zuidema/BitPar/wordclass/Data/JJR.uc]

BETTER
BIGGER
BROADER
CHEAPER
CLOSER
DEEPER
EARLIER
EASIER
FASTER
FEWER
GREATER
HARDER
HIGHER
LARGER
LESS
LONGER
LOWER
MORE
NEWER
OLDER
SAFER
SLOWER
SMALLER
SOFTER
STRONGER
TOUGHER
WEAKER
WIDER
WORSE
YOUNGER
