# Supplementary material
Source: ML conference proceedings conference paper supplement (https://aclanthology.org/D11-1008)
Supplement: Attachment [file D11-1008.Attachment.gz › EMNLP11_Sangati_Zuidema/BitPar/wordclass/Data/JJS.cap]

Best
Biggest
Greatest
Highest
Hottest
Largest
Latest
Least
Lowest
Most
Strongest
Worst
