# Supplementary material
Source: ML conference proceedings conference paper supplement (https://aclanthology.org/D11-1008)
Supplement: Attachment [file D11-1008.Attachment.gz › EMNLP11_Sangati_Zuidema/BitPar/wordclass/Data/JJS.uc]

BEST
BIGGEST
GREATEST
HIGHEST
HOTTEST
LARGEST
LATEST
LEAST
LOWEST
MOST
STRONGEST
WORST
