# Supplementary material
Source: ML conference proceedings conference paper supplement (https://aclanthology.org/D11-1008)
Supplement: Attachment [file D11-1008.Attachment.gz › EMNLP11_Sangati_Zuidema/BitPar/wordclass/Data/NN.lc]

ability
abortion
absence
abuse
access
accident
accord
account
accounting
acquisition
act
action
activity
actor
ad
addition
address
adjustment
administration
admission
adoption
advance
advantage
advertising
advice
adviser
aerospace
affair
affidavit
affiliate
aftermath
afternoon
age
agency
agenda
agent
agreement
agriculture
aid
aide
aim
air
aircraft
airline
airport
alliance
allocation
ally
alternative
aluminum
amendment
amount
analysis
analyst
anger
animal
anniversary
announcement
answer
anticipation
anxiety
anybody
anyone
anything
apartheid
apartment
apparel
appeal
appearance
appetite
apple
application
appointment
appreciation
approach
approval
arbitrage
architecture
area
argument
arm
army
arrangement
array
arrest
art
article
artist
asbestos
aspect
assassination
assembly
assessment
asset
assistance
assistant
associate
association
assumption
assurance
atmosphere
attack
attempt
attention
attitude
attorney
auction
audience
audit
author
authority
authorization
auto
automobile
availability
average
award
baby
back
background
backing
backlog
bailout
balance
balloon
ban
band
bank
banker
banking
bankruptcy
bar
bargain
bargaining
barrel
barrier
base
baseball
basis
basket
basketball
battle
bay
beauty
bed
beef
beer
beginning
behalf
behavior
belief
bench
benchmark
benefit
bet
bias
bid
bidder
bidding
bike
bill
billing
biotechnology
bit
blame
bloc
block
blood
blow
board
body
boiler
bond
bonus
book
boom
boost
border
borough
borrowing
boss
bottom
bourbon
box
brain
branch
brand
breach
break
breakdown
breakup
brewing
bridge
broadcast
broadcasting
broker
brokerage
brother
budget
building
bulk
burden
bureau
bureaucracy
bus
business
businessman
buy
buyer
buying
cabinet
cable
call
camera
campaign
cancer
candidate
candy
cap
capability
capacity
capital
capitalism
capitalization
car
carbon
card
care
career
cargo
carpet
carrier
case
cash
casino
cast
casualty
catalog
catalyst
catastrophe
category
cause
caution
ceiling
celebration
cell
cent
centennial
center
century
chain
chair
chairman
challenge
chamber
chance
change
character
charge
charity
charter
check
chemical
chief
child
chip
choice
cholesterol
chromosome
chunk
church
cigarette
circle
circuit
circulation
city
claim
class
cleanup
clearance
client
climate
climb
close
closing
clothing
clout
club
clutter
coal
coalition
coast
cocoa
code
coffee
collapse
collateral
collection
college
colon
colony
color
column
columnist
combat
combination
comeback
comedy
command
comment
commercial
commission
commissioner
commitment
committee
commodity
common
community
company
comparison
compensation
competition
competitor
complaint
completion
complex
compliance
component
composite
compromise
comptroller
computer
computing
concept
concern
conclusion
concrete
condition
conduct
conference
confidence
confirmation
conflict
confrontation
confusion
conglomerate
congressman
connection
consensus
consent
consideration
consolidation
consortium
conspiracy
construction
consultant
consulting
consumer
consumption
contact
contest
context
contract
contractor
contrast
contribution
control
controversy
convention
conversation
conversion
conviction
cooperation
copper
copy
core
corn
corner
corporation
correction
corruption
cost
cotton
council
counsel
count
counterpart
country
coup
couple
coupon
course
court
courtroom
coverage
crash
creation
credibility
credit
creditor
crime
crisis
critic
criticism
crop
crowd
crude
crunch
culture
currency
customer
cut
cycle
damage
danger
data
date
daughter
day
deadline
deal
dealer
dealership
death
debacle
debate
debt
debut
decade
decision
decline
deduction
default
defendant
defense
deficit
definition
degree
delay
delegation
delivery
demand
democracy
department
departure
deposit
depository
depreciation
deputy
deregulation
desert
design
designer
desire
desk
destruction
detail
deterioration
devaluation
developer
development
device
dialogue
dictator
difference
difficulty
dignity
dinner
direction
director
disappointment
disarray
disaster
discipline
disclosure
discount
discounting
discovery
discrimination
discussion
disease
disk
dismissal
disobedience
display
dispute
disruption
distance
distribution
distributor
district
diversification
dividend
division
doctor
document
dog
dollar
door
doubt
downtown
downturn
dozen
drama
dream
drilling
drinking
drive
drop
drug
duck
duty
earth
earthquake
economist
economy
edge
edition
editor
editorial
education
effect
efficiency
effort
egg
election
electricity
electronics
element
embarrassment
emergency
emphasis
empire
employee
employer
employment
end
energy
enforcement
engine
engineer
engineering
enough
entertainment
enthusiasm
entity
entrepreneur
entry
environment
epicenter
episode
equipment
equity
equivalent
era
error
establishment
estate
estimate
evaluation
evening
event
everybody
everyone
everything
evidence
examination
example
exception
excess
exchange
exclusion
excuse
execution
executive
exercise
exhibition
existence
exodus
expansion
expense
experience
experiment
expert
expertise
expiration
explanation
exploration
export
exposure
extension
extent
eye
face
facility
fact
factor
factory
failure
fall
family
fare
farm
farmer
fashion
fate
father
fault
favor
fear
feature
fee
feeling
fellow
felony
field
fight
figure
filing
film
finance
financier
financing
fine
fire
firm
fishing
fit
flag
flagship
fleet
flexibility
flight
floor
flow
focus
following
food
foot
football
force
forecast
forest
forfeiture
form
formation
formula
foundation
founder
franc
franchise
franchisee
fraud
freedom
freeway
freight
friend
front
fruit
frustration
fuel
fun
function
fund
funding
fur
furniture
fusion
future
gain
gallery
game
gap
garden
gas
gasoline
gene
general
generation
ghost
giant
gin
glass
goal
gold
golf
government
governor
grain
greenhouse
grip
grocery
ground
group
growth
guarantee
guard
guide
guy
hair
half
halt
hand
handful
handling
hardware
harvest
head
headline
headquarters
health
hearing
heart
heat
helicopter
help
high
highway
history
hit
hold
holder
holding
hole
holiday
home
hope
horse
hospital
host
hotel
hour
house
household
housing
hurricane
husband
ice
idea
identity
illustration
image
impact
impeachment
import
importance
impression
improvement
incentive
incest
incident
income
increase
independence
index
indexing
indication
indicator
indictment
individual
industry
inflation
influence
information
infrastructure
initiative
injunction
ink
inquiry
insider
instance
institute
institution
instrument
insulin
insurance
insurer
integration
integrity
intelligence
intent
intention
interbank
interest
interpretation
intervention
interview
introduction
inventory
investigation
investing
investment
investor
involvement
iron
island
issuance
issue
item
jail
jet
jewelry
job
joint
journal
judge
judgment
jump
junk
jury
justice
key
kidney
kind
king
knight
knowledge
labor
laboratory
lack
land
landing
landscape
language
launch
law
lawn
lawsuit
lawyer
lead
leader
leadership
league
lease
leasing
leg
legislation
legislator
legislature
lending
length
lesson
letter
level
leverage
liability
license
life
light
likelihood
limit
line
link
liquidation
liquidity
liquor
list
litigation
living
load
loan
lobby
lobbyist
location
look
loss
lot
love
low
loyalty
lunch
lung
luxury
machine
machinery
magazine
mail
mainframe
maintenance
majority
maker
making
man
management
manager
managing
manner
manufacturer
manufacturing
margin
mark
market
marketer
marketing
marketplace
marriage
mart
mass
massacre
massage
master
material
matter
maturity
maximum
mayor
meantime
measure
meat
mechanism
mediator
medicine
meeting
member
membership
memo
memory
merchandise
merchant
merger
mess
message
metal
method
middle
midnight
midst
military
milk
mill
mind
mine
minimum
mining
minister
ministry
minority
minute
missile
mission
mistake
mix
model
moment
momentum
money
monitoring
month
mood
morning
mortality
mortgage
mother
motion
motor
mountain
move
movement
movie
murder
music
mystery
name
nation
nature
navy
neck
need
neighborhood
net
network
news
newsletter
newspaper
newsprint
niche
night
nobody
none
noon
note
nothing
notice
notion
novel
number
obligation
obstacle
offer
offering
office
officer
official
oil
one
opening
operating
operation
operator
opinion
opportunity
opposition
option
order
organization
ounce
outcome
outcry
outlook
output
overhaul
owner
ownership
ozone
pace
pachinko
package
packaging
pact
page
painting
palladium
panel
panic
paper
par
parent
parity
park
parking
part
participation
partner
partnership
party
passage
passenger
past
patent
path
patient
pattern
pay
payment
payroll
peace
peak
penalty
pence
penny
pension
percent
percentage
perception
performance
period
permission
person
perspective
petrochemical
petroleum
phase
phenomenon
philosophy
phone
physician
pickup
picture
piece
pill
pilot
pipeline
pit
pitch
place
placement
plan
plane
planet
planner
planning
plant
plastic
plate
platform
platinum
play
player
plea
plenty
plot
plunge
point
poison
police
policy
poll
pollution
pool
popularity
population
pork
portfolio
portion
position
possibility
post
potential
pound
poverty
power
practice
predecessor
preference
pregnancy
premium
presence
presidency
president
press
pressure
pretax
price
pricing
pride
principal
principle
print
printer
printing
priority
prison
privatization
privilege
probe
problem
procedure
process
processing
producer
product
production
productivity
professor
profile
profit
profitability
program
programming
progress
project
projection
promise
promotion
proof
property
proportion
proposal
prosecution
prosecutor
prospect
prospectus
protection
protein
protest
provider
province
provision
psychology
psyllium
public
publication
publicity
publisher
publishing
pulp
purchase
purchasing
purpose
pursuit
push
put
quake
quality
quarter
question
race
racketeering
radar
radiation
radio
raider
railroad
rain
raise
rally
range
rape
rate
rating
ratio
reaction
reading
reality
reason
rebound
recapitalization
receivables
recession
recognition
recommendation
record
recovery
redemption
reduction
refinancing
refinery
refining
reform
refund
regime
region
registration
regulation
regulator
reinsurance
rejection
relationship
release
relief
reluctance
remainder
reminder
removal
rent
reorganization
repair
repeal
replacement
report
reporter
reporting
representation
representative
repurchase
reputation
request
requirement
rescue
research
researcher
reserve
resignation
resistance
resolution
resort
respect
response
responsibility
rest
restaurant
restraint
restructuring
result
retail
retailer
retailing
retirement
return
reunification
revenue
reversal
review
revival
revolution
rhetoric
rice
ride
right
rise
risk
rival
road
rock
role
roll
room
round
route
row
rubble
ruble
rule
ruling
run
safety
salary
sale
salesman
sand
satellite
satisfaction
scale
scandal
scenario
scene
schedule
scheme
school
science
scientist
screen
scrutiny
sea
search
season
seat
second
secretary
section
sector
security
sedan
seed
segment
selection
sell
seller
selling
semiconductor
senator
sense
sentence
sentiment
series
service
session
set
setback
settlement
sex
shadow
shah
shape
share
shareholder
sheet
shelf
shift
ship
shipping
shipyard
shock
shop
shopping
shortage
shot
show
shuttle
side
sign
signal
silver
singer
sister
site
situation
size
ski
skin
slate
slide
slowdown
slump
smoking
socialism
society
software
soil
solicitation
solution
somebody
someone
something
son
song
sort
sound
source
soybean
space
specialist
specialty
speculation
speech
speed
spending
spill
spinoff
spirit
split
spokesman
spokeswoman
sponsor
sport
spot
spread
spree
spring
spy
squeeze
stability
stadium
staff
stage
stake
stance
stand
standard
standing
star
start
state
statement
station
status
statute
steam
steel
steelmaker
step
sterling
stock
stop
storage
store
storm
story
strain
strategist
strategy
stream
street
strength
stress
stretch
strike
string
strip
structure
struggle
student
studio
study
stuff
style
subcommittee
subject
subsidiary
success
successor
sugar
suggestion
suit
suitor
sum
summer
summit
supercomputer
supermarket
supervisor
supplier
supply
support
surface
surge
surgery
surplus
surprise
survey
survival
suspension
swap
symbol
syndicate
syndrome
system
table
takeover
tale
talent
talk
tank
tape
target
task
taste
tax
taxation
tea
team
technique
technology
telecommunications
telephone
television
temblor
tender
tension
tenure
term
terminal
territory
terrorism
test
testimony
testing
text
theater
theft
theme
theory
therapy
thing
thought
threat
thrift
ticket
time
timetable
timing
tire
tissue
title
tobacco
today
toll
tomorrow
ton
tone
tool
top
topic
total
touch
tour
tourism
tourist
tower
town
toxin
toy
track
trade
trader
trading
tradition
traffic
train
training
transaction
transfer
transition
transport
transportation
travel
treasurer
treasury
treatment
treaty
trend
trial
trip
trouble
truck
trust
truth
tuition
tumor
turmoil
turn
turnaround
turnover
type
uncertainty
underwriter
underwriting
unemployment
union
unit
university
use
user
utility
utilization
vacancy
vaccine
value
variety
vehicle
venture
verdict
version
veteran
veto
vice
victim
victory
video
view
violation
violence
virus
vision
visit
voice
volatility
volume
vote
voting
wage
wake
wall
war
warming
warning
warrant
waste
water
wave
way
weakness
wealth
weapon
weather
week
weekend
weight
wheat
while
whole
wife
will
willingness
window
winner
winter
wire
wisdom
withdrawal
witness
woman
wood
word
work
worker
world
worm
worth
writer
wrongdoing
year
yen
yesterday
yield
youth
