# Supplementary material
Source: ML conference proceedings conference paper supplement (https://aclanthology.org/D11-1008)
Supplement: Attachment [file D11-1008.Attachment.gz › EMNLP11_Sangati_Zuidema/BitPar/wordclass/Data/NNS.cap]

Abortions
Abuses
Accountants
Accounts
Accusations
Acquisitions
Acres
Actions
Activists
Activities
Actors
Acts
Adjusters
Adjustments
Ads
Adults
Advances
Advantages
Advertisers
Advisers
Advocates
Affairs
Affiliates
Aftershocks
Agencies
Agents
Agreements
Aides
Airlines
Allegations
Alliances
Allies
Alternatives
Amendments
Amounts
Analysts
Animals
Announcements
Answers
Apartments
Appeals
Apples
Applications
Appropriations
Approvals
Areas
Arguments
Arms
Arrangements
Articles
Artists
Aspects
Assets
Associates
Associations
Assumptions
Attacks
Attempts
Attendants
Attitudes
Attorneys
Audiences
Authorities
Authors
Averages
Bacteria
Bags
Bankers
Banks
Barrels
Barriers
Bases
Baskets
Beneficiaries
Benefits
Bidders
Bids
Bikes
Billions
Bills
Blacks
Blocks
Boards
Bondholders
Bonds
Bonuses
Books
Borrowers
Borrowings
Branches
Brands
Breakers
Breaks
Bridges
Brokers
Brothers
Budgets
Bugs
Builders
Buildings
Bureaucrats
Businesses
Businessmen
Buyers
Calculations
Calls
Campaigns
Candidates
Cards
Carriers
Cars
Cases
Categories
Cattle
Causes
Cells
Centers
Cents
Certificates
Chains
Challenges
Chances
Changes
Channels
Characters
Charges
Charities
Checks
Chemicals
Children
Chips
Choices
Cigarettes
Circumstances
Cities
Citizens
Claims
Classes
Clients
Clothes
Coins
Colleagues
Columns
Comments
Commercials
Commissions
Commitments
Committees
Commodities
Communications
Communities
Commuters
Companies
Comparisons
Competitors
Complaints
Components
Computers
Concerns
Concessions
Conditions
Conflicts
Consequences
Conservatives
Considerations
Constituents
Consultants
Consumers
Contacts
Contractors
Contracts
Contributions
Controls
Conversations
Cooperatives
Copies
Corporations
Cosmetics
Costs
Counterparts
Countries
Counts
Couples
Coupons
Courses
Courts
Credentials
Creditors
Credits
Crimes
Criminals
Criteria
Critics
Crops
Currencies
Customers
Cuts
Cycles
Damages
Data
Daughters
Days
Dealers
Dealings
Deals
Deaths
Debentures
Debts
Decades
Decisions
Decliners
Declines
Deductions
Defaults
Defects
Defendants
Deficits
Delays
Demands
Demonstrations
Demonstrators
Denominations
Departments
Deposits
Designs
Desks
Details
Detectors
Developers
Developments
Devices
Diabetics
Diamonds
Differences
Difficulties
Directors
Disasters
Discounts
Discussions
Diseases
Disks
Displays
Disputes
Distributors
Districts
Dividends
Divisions
Doctors
Documents
Dollars
Donations
Doors
Doubts
Dozens
Drivers
Drives
Drugs
Duties
Earnings
Earthquakes
Economics
Economies
Economists
Editions
Effects
Efforts
Eggs
Elections
Electronics
Elements
Emissions
Employees
Employers
Enemies
Engineers
Engines
Enterprises
Entities
Entrepreneurs
Environmentalists
Equities
Errors
Estimates
Ethics
Events
Exceptions
Exchanges
Executives
Expectations
Expenditures
Expenses
Experiments
Experts
Exports
Eyes
Facilities
Factories
Factors
Facts
Failures
Families
Fans
Fares
Farmers
Farms
Fears
Features
Feelings
Fees
Feet
Fields
Figures
Filings
Films
Finances
Findings
Fines
Firms
Flights
Fluctuations
Forces
Forecasts
Foreigners
Forms
Franchisees
Francs
Friends
Fuels
Functions
Fundamentals
Funds
Furriers
Furs
Futures
Gainers
Gains
Games
Generations
Genes
Ghosts
Giants
Goals
Goods
Governments
Grants
Graphics
Grounds
Groups
Growers
Guarantees
Guidelines
Guys
Gyrations
Hands
Hats
Headquarters
Heads
Hearings
Heels
Highs
Highways
Hits
Holders
Holdings
Homeowners
Homes
Hopes
Hospitals
Hotels
Hours
Households
Houses
Humans
Hundreds
Ideas
Images
Implications
Imports
Improvements
Incentives
Inches
Increases
Indexes
Indications
Indicators
Individuals
Industrials
Industries
Initiatives
Injuries
Inquiries
Insiders
Installations
Institutions
Instructions
Instruments
Insurers
Intentions
Interests
Interviews
Inventories
Investigations
Investigators
Investments
Investors
Issuers
Issues
Items
Jobs
Journalists
Judges
Jurors
Kids
Killings
Kinds
Kronor
Laboratories
Lawmakers
Laws
Lawsuits
Lawyers
Leaders
Legislators
Lenders
Letters
Levels
Liabilities
Licenses
Limitations
Limits
Lines
Links
Lire
Lists
Lives
Loans
Locations
Losers
Losses
Lots
Lows
Machines
Machinists
Magazines
Mainframes
Makers
Managers
Manufacturers
Margins
Marketers
Markets
Marks
Masters
Materials
Matters
Maturities
Means
Measures
Media
Meetings
Members
Memories
Men
Mergers
Messages
Metals
Methods
Middlemen
Miles
Milestones
Millions
Mills
Minds
Mines
Ministers
Minorities
Minutes
Missiles
Mistakes
Models
Moments
Months
Mortgages
Movements
Moves
Movies
Multiples
Names
Nations
Needs
Negotiations
Negotiators
Neighborhoods
Neighbors
Nerves
Networks
Newspapers
Nights
Notes
Numbers
Objectives
Obligations
Observers
Obstacles
Occasions
Odds
Offerings
Offers
Officers
Offices
Officials
Ones
Operations
Operators
Opinions
Opponents
Opportunities
Options
Orders
Organizations
Others
Ounces
Outlays
Outlets
Outsiders
Owners
Packages
Pages
Paintings
Panels
Papers
Parents
Participants
Parties
Partners
Partnerships
Parts
Passengers
Patents
Patients
Patterns
Payments
Penalties
Pence
People
Periods
Personnel
Pesticides
Pharmaceuticals
Phones
Photos
Pictures
Pieces
Pills
Pilots
Places
Plaintiffs
Planes
Planners
Plans
Plants
Plastics
Players
Points
Police
Policies
Politicians
Politics
Polls
Portfolios
Positions
Possibilities
Posts
Pounds
Powers
Practices
Predictions
Premiums
Presidents
Pressures
Prices
Pricings
Principles
Priorities
Problems
Procedures
Proceedings
Proceeds
Producers
Products
Professionals
Profits
Programs
Projections
Projects
Promotions
Properties
Proposals
Pros
Prosecutions
Prosecutors
Prospects
Protesters
Protests
Provisions
Publications
Publishers
Purchases
Purposes
Quantities
Quarters
Questions
Quotas
Quotations
Races
Rallies
Ranges
Ranks
Rates
Ratings
Reactions
Readers
Reasons
Rebels
Receipts
Recommendations
Recorders
Records
Reductions
Reforms
Refugees
Refunds
Regions
Regulations
Regulators
Relations
Relationships
Remarks
Repairs
Reporters
Reports
Representatives
Requests
Requirements
Researchers
Reserves
Residents
Resignations
Resorts
Resources
Respondents
Responses
Responsibilities
Restaurants
Restrictions
Results
Retailers
Returns
Revenues
Reviews
Revisions
Riders
Rights
Risks
Rivals
Roads
Rooms
Routes
Rubles
Rules
Rumors
Salaries
Sales
Salesmen
Sanctions
Savings
Scams
Scandals
Schedules
Schools
Scientists
Scores
Screens
Seasons
Seats
Seconds
Sectors
Securities
Seeds
Segments
Sellers
Senators
Services
Sessions
Sets
Settlements
Shareholders
Shares
Sheets
Shipments
Shippers
Ships
Shoes
Shops
Shortages
Shows
Sidelines
Sides
Signals
Signs
Sites
Skills
Solutions
Sorts
Sources
Specialists
Speculators
Spirits
Sports
Spots
Staffers
Staffs
Stages
Stakes
Standards
Statements
States
Stations
Statistics
Steelmakers
Steps
Stockholders
Stocks
Stores
Stories
Strategies
Streets
Strikes
Structures
Students
Studies
Subjects
Subscribers
Subsidiaries
Subsidies
Suggestions
Suits
Suppliers
Supplies
Supporters
Surveys
Swings
Symptoms
Systems
Tables
Tactics
Takeovers
Talks
Tanks
Targets
Tariffs
Tasks
Taxes
Taxpayers
Teachers
Teams
Technicians
Techniques
Technologies
Telecommunications
Temperatures
Terminals
Terms
Tests
Thanks
Things
Thousands
Threats
Thrifts
Tickets
Ties
Times
Tons
Tools
Tourists
Traders
Trades
Transactions
Transfers
Travelers
Trees
Tremors
Trends
Trials
Trips
Troops
Troubles
Trucks
Types
Uncertainties
Underwriters
Unions
Units
Universities
Users
Uses
Utilities
Values
Variations
Vehicles
Ventures
Versions
Vessels
Victims
Viewers
Views
Violations
Visitors
Visits
Voices
Voters
Votes
Wages
Walls
Warnings
Warrants
Wars
Waters
Waves
Ways
Weaknesses
Weapons
Weeks
Wells
Whites
Windows
Winners
Withdrawals
Witnesses
Women
Words
Workers
Works
Workstations
Worries
Writers
Years
Yen
Yields
