# Supplementary material
Source: ML conference proceedings conference paper supplement (https://aclanthology.org/D11-1008)
Supplement: Attachment [file D11-1008.Attachment.gz › EMNLP11_Sangati_Zuidema/BitPar/wordclass/Data/RB.cap]

About
Abroad
Absolutely
Actively
Actually
After
Again
Aggressively
Ago
Ahead
Alike
All
Allegedly
Almost
Alone
Along
Already
Also
Altogether
Always
Annually
Anymore
Anyway
Anywhere
Apart
Apiece
Apparently
Approximately
Around
As
Aside
Automatically
Away
Back
Badly
Barely
Basically
Because
Before
Below
Better
Carefully
Certainly
Clearly
Close
Closely
Completely
Considerably
Consistently
Constantly
Currently
Daily
Deeply
Definitely
Directly
Double
Down
Due
Earlier
Early
Easily
Effectively
Either
Else
Elsewhere
Enough
Entirely
Especially
Essentially
Even
Eventually
Ever
Exactly
Extremely
Fairly
Far
Fast
Federally
Finally
Financially
First
Forever
Formally
Formerly
Forward
Frequently
Fully
Further
Generally
Gradually
Greatly
Hard
Hardly
Heavily
Here
Highly
Home
However
Illegally
Immediately
In
Incorrectly
Increasingly
Indeed
Inevitably
Initially
Instead
Jointly
Just
Largely
Last
Late
Lately
Later
Likely
Little
Long
Longer
Mainly
Maybe
Meanwhile
Merely
Modestly
Mostly
Much
Naturally
Nearly
Necessarily
Never
Newly
No
Nonetheless
Normally
North
Not
Notably
Now
Obviously
Occasionally
Off
Officially
Often
On
Once
Only
Openly
Originally
Otherwise
Out
Over
Overseas
Particularly
Partly
Perhaps
Politically
Possibly
Potentially
Pretty
Previously
Primarily
Prior
Privately
Probably
Properly
Publicly
Quickly
Quietly
Quite
Rapidly
Rarely
Rather
Really
Recently
Regardless
Regularly
Relatively
Repeatedly
Reportedly
Respectively
Right
Roughly
Routinely
Seasonally
Seemingly
Separately
Seriously
Sharply
Short
Shortly
Significantly
Simply
Slightly
Slowly
So
Solely
Somehow
Sometimes
Somewhat
Somewhere
Soon
South
Specifically
Steadily
Still
Strongly
Subsequently
Substantially
Successfully
Suddenly
Surely
Surprisingly
Temporarily
Tentatively
That
Then
There
Thereafter
Thereby
Therefore
Though
Through
Thus
Together
Too
Totally
Traditionally
Truly
Twice
Typically
Ultimately
Unanimously
Unusually
Up
Upward
Usually
Very
Virtually
Voluntarily
Well
Widely
Yesterday
Yet
