# Supplementary material
Source: ML conference proceedings conference paper supplement (https://aclanthology.org/D11-1008)
Supplement: Attachment [file D11-1008.Attachment.gz › EMNLP11_Sangati_Zuidema/BitPar/wordclass/Data/RBR.cap]

Better
Closer
Earlier
Faster
Further
Harder
Higher
Later
Less
Longer
Lower
More
Sooner
