# Supplementary material
Source: ML conference proceedings conference paper supplement (https://aclanthology.org/D11-1008)
Supplement: Attachment [file D11-1008.Attachment.gz › EMNLP11_Sangati_Zuidema/BitPar/wordclass/Data/RBR.lc]

better
closer
earlier
faster
further
harder
higher
later
less
longer
lower
more
sooner
