# Supplementary material
Source: ML conference proceedings conference paper supplement (https://aclanthology.org/D11-1008)
Supplement: Attachment [file D11-1008.Attachment.gz › EMNLP11_Sangati_Zuidema/BitPar/wordclass/Data/RBR.uc]

BETTER
CLOSER
EARLIER
FASTER
FURTHER
HARDER
HIGHER
LATER
LESS
LONGER
LOWER
MORE
SOONER
