# Supplementary material
Source: ML conference proceedings conference paper supplement (https://aclanthology.org/D11-1008)
Supplement: Attachment [file D11-1008.Attachment.gz › EMNLP11_Sangati_Zuidema/BitPar/wordclass/Data/VV.lc]

abandon
absorb
accept
accommodate
accomplish
achieve
acquire
act
add
address
adjust
adopt
advise
affect
afford
agree
aid
allow
alter
announce
answer
appeal
appear
apply
approve
argue
ask
assess
assist
assume
attract
avoid
back
ban
bear
beat
become
begin
believe
benefit
bid
blame
block
bolster
boost
borrow
break
bring
build
buy
call
cancel
care
carry
catch
cause
challenge
change
charge
check
choose
clean
clear
close
collect
combine
come
comment
compare
compensate
compete
complain
complete
comply
concentrate
conduct
confirm
consider
consolidate
contain
continue
contribute
control
convert
convince
cooperate
coordinate
cope
correct
cost
counter
cover
create
curb
cut
damp
deal
decide
decline
defend
delay
deliver
demand
deny
design
destroy
determine
develop
die
disclose
discuss
distribute
double
draw
drive
drop
dump
earn
ease
eat
elaborate
eliminate
emerge
enable
encourage
end
engage
enhance
enjoy
ensure
enter
establish
estimate
evaluate
examine
exceed
exercise
exist
expand
expect
expire
explain
exploit
explore
export
extend
face
fail
fall
favor
feel
fend
fight
file
fill
finance
find
fit
fly
focus
follow
force
forget
form
fund
gain
generate
get
give
go
grow
guarantee
halt
handle
happen
head
hear
help
hide
hire
hit
hold
hurt
identify
ignore
impose
improve
include
increase
indicate
induce
influence
install
interpret
introduce
invest
investigate
involve
issue
join
jump
justify
keep
kill
know
last
launch
lay
lead
learn
lease
leave
lend
let
lift
like
limit
listen
live
look
lose
lower
maintain
make
manage
market
match
mean
measure
meet
mention
merge
mind
modernize
monitor
move
name
need
negotiate
obtain
occur
offer
offset
open
operate
oppose
oust
overcome
overhaul
override
own
participate
pass
pay
perform
permit
persuade
pick
place
plan
play
plead
post
postpone
predict
prefer
prepare
present
preserve
press
prevent
proceed
produce
profit
promote
protect
prove
provide
publish
pull
purchase
pursue
push
put
qualify
raise
rally
reach
read
realize
rebuild
receive
recognize
recommend
record
recover
redeem
reduce
reflect
regain
reject
release
rely
remain
remember
remove
reopen
repair
repay
replace
report
represent
require
resign
resolve
respond
restore
restrict
restructure
result
resume
retain
retire
return
reveal
reverse
review
revive
ride
rise
rule
run
satisfy
save
say
scuttle
secure
see
seek
seem
seize
sell
send
serve
set
settle
shake
share
shift
ship
show
sign
sit
slow
solve
sound
spark
speak
specify
speculate
speed
spend
spin
spur
stabilize
stand
start
stay
steal
stem
step
stock
stop
strengthen
strike
study
submit
succeed
suffer
suggest
supply
support
survive
sustain
switch
take
talk
tell
test
testify
think
throw
total
trade
transfer
transform
travel
treat
trim
try
turn
understand
unveil
urge
use
veto
view
violate
visit
vote
wait
walk
want
watch
weaken
wear
win
withdraw
work
worry
write
yield
