# Supplementary material
Source: ML conference proceedings conference paper supplement (https://aclanthology.org/D11-1008)
Supplement: Attachment [file D11-1008.Attachment.gz › EMNLP11_Sangati_Zuidema/BitPar/wordclass/Data/VVD.cap]

Abandoned
Accepted
Accounted
Accused
Achieved
Acknowledged
Acquired
Added
Admitted
Adopted
Advanced
Advised
Agreed
Alleged
Allowed
Amounted
Announced
Appeared
Approved
Argued
Arrived
Asked
Asserted
Assumed
Attended
Attracted
Attributed
Authorized
Averaged
Awarded
Backed
Became
Began
Believed
Bid
Blamed
Boosted
Bought
Broke
Brought
Built
Called
Came
Capped
Carried
Caused
Cautioned
Changed
Charged
Chose
Cited
Claimed
Cleared
Climbed
Closed
Collapsed
Complained
Completed
Conceded
Concluded
Confirmed
Considered
Contended
Continued
Contributed
Cost
Created
Criticized
Cut
Decided
Declared
Declined
Defended
Demanded
Denied
Described
Developed
Died
Disclosed
Discovered
Doubled
Drew
Dropped
Drove
Dumped
Earned
Eased
Edged
Elected
Emerged
Ended
Entered
Established
Estimated
Exceeded
Expected
Expired
Explained
Expressed
Extended
Faced
Failed
Fell
Felt
Figured
Filed
Finished
Fled
Flew
Followed
Forced
Formed
Found
Founded
Gained
Gave
Generated
Got
Grew
Handled
Happened
Headed
Heard
Held
Helped
Hired
Hit
Hoped
Improved
Included
Increased
Indicated
Insisted
Intended
Introduced
Invested
Involved
Issued
Joined
Jumped
Kept
Killed
Knew
Knocked
Launched
Learned
Led
Left
Let
Lived
Looked
Lost
Lowered
Made
Managed
Marked
Meant
Met
Moved
Named
Needed
Noted
Observed
Occurred
Offered
Opened
Operated
Opposed
Ordered
Owned
Paid
Passed
Picked
Placed
Planned
Played
Pleaded
Plummeted
Plunged
Pointed
Posted
Predicted
Produced
Promised
Prompted
Proposed
Proved
Provided
Pulled
Purchased
Pushed
Put
Questioned
Raised
Rallied
Ran
Reached
Reacted
Read
Realized
Rebounded
Received
Recommended
Recorded
Recovered
Reduced
Referred
Reflected
Refused
Rejected
Released
Remained
Replaced
Reported
Represented
Requested
Required
Resigned
Responded
Resulted
Retained
Retired
Returned
Rose
Ruled
Said
Sank
Sat
Saw
Scrambled
Seemed
Sent
Served
Set
Settled
Shook
Showed
Signaled
Signed
Slashed
Slid
Slipped
Slowed
Soared
Sold
Sought
Spent
Spoke
Started
Stayed
Stemmed
Stepped
Stood
Stopped
Struck
Sued
Suffered
Suggested
Supported
Surged
Surprised
Suspended
Sustained
Talked
Testified
Thought
Threatened
Threw
Told
Took
Topped
Totaled
Traded
Tried
Triggered
Tumbled
Turned
Unveiled
Urged
Used
Violated
Visited
Voted
Vowed
Wanted
Warned
Went
Withdrew
Won
Worked
Wrote
