# Supplementary material
Source: ML conference proceedings conference paper supplement (https://aclanthology.org/D11-1008)
Supplement: Attachment [file D11-1008.Attachment.gz › EMNLP11_Sangati_Zuidema/BitPar/wordclass/Data/VVG.lc]

accepting
according
accounting
acquiring
acting
adding
advertising
advising
affecting
agreeing
allowing
announcing
arguing
asking
assuming
attempting
attending
attracting
backing
banking
banning
becoming
beginning
betting
blocking
boosting
breaking
bringing
building
buying
calling
carrying
causing
changing
charging
citing
claiming
climbing
closing
collecting
combining
coming
competing
completing
concentrating
concerning
conducting
considering
consisting
consulting
containing
continuing
controlling
converting
covering
creating
cutting
dealing
deciding
declining
demanding
depending
describing
developing
discounting
discussing
driving
dropping
earning
easing
eliminating
emerging
ending
entering
equaling
establishing
exceeding
excluding
existing
expanding
expecting
experiencing
explaining
exploring
extending
facing
failing
falling
featuring
feeling
fighting
filing
filling
financing
finding
flying
focusing
following
forcing
funding
gaining
getting
giving
going
governing
growing
handling
happening
heading
hearing
helping
hiring
holding
hoping
hurting
ignoring
imposing
improving
including
increasing
indicating
insisting
introducing
investigating
investing
involving
issuing
joining
keeping
killing
knocking
knowing
launching
leading
learning
leaving
lending
letting
limiting
linking
living
lobbying
looking
losing
lowering
maintaining
making
managing
manufacturing
marketing
marking
matching
maturing
meaning
meeting
missing
monitoring
mounting
moving
negotiating
noting
obtaining
offering
offsetting
opening
operating
opposing
ordering
owning
participating
passing
paying
pending
performing
picking
planning
playing
posting
pouring
predicting
preparing
pressing
processing
producing
promoting
prompting
proposing
protecting
providing
publishing
pulling
purchasing
pursuing
pushing
putting
raising
ranging
reaching
reading
receiving
recovering
reducing
referring
reflecting
regarding
relating
remaining
removing
renewing
replacing
reporting
representing
requiring
resigning
responding
restructuring
resulting
retiring
returning
reviewing
riding
rising
rolling
ruling
running
rushing
saving
saying
seeing
seeking
selling
sending
serving
setting
settling
shaking
shifting
shipping
showing
sitting
slipping
slowing
soaring
spending
spreading
stabilizing
standing
starting
stemming
struggling
studying
succeeding
suffering
suggesting
supporting
surrounding
taking
talking
targeting
telling
thinking
threatening
throwing
totaling
trading
trying
turning
underlying
urging
using
violating
voting
waiting
warning
watching
weakening
wearing
winning
wondering
working
writing
yielding
