# Supplementary material
Source: ML conference proceedings conference paper supplement (https://aclanthology.org/D11-1008)
Supplement: Attachment [file D11-1008.Attachment.gz › EMNLP11_Sangati_Zuidema/BitPar/wordclass/Data/VVN.lc]

abandoned
accepted
accompanied
accrued
accused
achieved
acquired
added
adjusted
admitted
adopted
advanced
affected
agreed
aided
aimed
alleged
allowed
announced
anticipated
applied
appointed
approached
approved
arrested
asked
assigned
associated
assumed
assured
attached
attracted
attributed
authorized
avoided
awarded
backed
banned
based
become
begun
believed
bid
blamed
bolstered
boosted
born
borrowed
bought
broken
brought
built
calculated
called
canceled
captured
carried
caught
caused
changed
charged
chosen
cited
claimed
cleared
closed
combined
come
committed
compared
compiled
completed
complicated
concerned
concluded
conducted
confirmed
connected
considered
continued
contributed
controlled
converted
convicted
convinced
counted
covered
created
criticized
cut
damaged
dated
decided
declined
defined
delayed
delivered
denied
described
designated
designed
determined
developed
diluted
disappointed
disclosed
discontinued
discovered
discussed
dismissed
distributed
diverted
divided
dominated
donated
doubled
drawn
driven
dropped
dubbed
earned
elected
eliminated
employed
enacted
encouraged
ended
engaged
engineered
enhanced
entered
established
estimated
executed
expanded
expected
experienced
exposed
expressed
extended
faced
failed
fallen
filed
filled
financed
fired
fixed
followed
forced
forecast
formed
found
founded
fueled
funded
gained
given
gone
got
gotten
granted
grown
guaranteed
halted
hampered
handled
happened
headed
heard
held
helped
hired
hit
hoped
hurt
identified
ignored
imported
imposed
improved
included
increased
incurred
indicated
indicted
informed
injured
installed
insured
integrated
intended
interested
introduced
invested
invited
involved
issued
joined
kept
killed
known
launched
learned
led
left
leveraged
lifted
limited
linked
listed
located
lost
lowered
made
maintained
managed
matched
meant
measured
mentioned
met
mixed
moved
named
needed
negotiated
noted
notified
obtained
offered
offset
omitted
opened
opposed
ordered
organized
owed
owned
packaged
paid
passed
perceived
performed
permitted
placed
planned
played
posted
predicted
preferred
prepared
presented
priced
produced
projected
promised
proposed
protected
proved
provided
published
pulled
purchased
pushed
put
quoted
raised
rated
reached
read
realized
received
recognized
recommended
recorded
reduced
reflected
refused
regarded
registered
rejected
related
released
removed
renewed
repeated
replaced
reported
represented
requested
required
resolved
restated
restored
restricted
restructured
resulted
returned
revamped
revised
risen
ruled
rumored
run
said
scheduled
secured
seen
selected
sent
sentenced
served
set
settled
shared
shipped
shown
signed
slated
sold
sought
specified
spent
spread
squeezed
stalled
started
stated
stolen
stopped
structured
submitted
subordinated
succeeded
sued
suffered
suggested
supported
supposed
surprised
surveyed
suspended
sustained
taken
targeted
tendered
thought
threatened
thrown
tied
told
traded
transferred
translated
treated
tried
triggered
troubled
turned
undertaken
used
valued
viewed
watched
withdrawn
won
worked
worried
written
