# Supplementary material
Source: ML conference proceedings conference paper supplement (https://aclanthology.org/D11-1008)
Supplement: Attachment [file D11-1008.Attachment.gz › EMNLP11_Sangati_Zuidema/BitPar/wordclass/Data/VVP.lc]

account
add
agree
allow
appear
argue
become
begin
believe
bring
build
buy
call
carry
charge
claim
come
consider
contend
continue
create
estimate
exceed
exist
expect
face
fall
favor
fear
feel
find
get
give
go
hear
help
hold
hope
include
indicate
insist
keep
know
leave
like
live
look
lose
maintain
make
mean
move
need
note
offer
operate
oppose
own
pay
plan
point
predict
prefer
produce
provide
put
question
range
read
realize
receive
reflect
remain
report
represent
require
rise
run
say
see
seem
sell
show
sit
spend
stand
start
stay
suggest
take
tell
tend
think
try
turn
understand
use
vary
view
want
wish
wonder
work
worry
