# Supplementary material
Source: ML conference proceedings conference paper supplement (https://aclanthology.org/D11-1008)
Supplement: Attachment [file D11-1008.Attachment.gz › EMNLP11_Sangati_Zuidema/BitPar/wordclass/Data/VVZ.lc]

accounts
acknowledges
acts
adds
admits
advises
agrees
aims
alleges
allows
amounts
anticipates
appears
argues
asks
asserts
assumes
bears
becomes
begins
believes
boasts
brings
buys
calls
carries
causes
charges
claims
comes
compares
complains
concedes
concludes
considers
consists
contains
contends
continues
controls
costs
covers
creates
cuts
decides
declares
declines
denies
depends
describes
directs
employs
ends
estimates
exceeds
expects
expires
explains
faces
falls
favors
feels
figures
finds
fits
follows
gets
gives
goes
grows
happens
heads
helps
holds
hopes
illustrates
implies
includes
increases
indicates
insists
intends
involves
keeps
knows
lacks
leads
leaves
lies
likes
lives
looks
maintains
makes
manages
marks
means
measures
moves
needs
notes
occurs
offers
opens
operates
opposes
oversees
owes
owns
pays
plans
plays
points
predicts
produces
promises
proposes
provides
publishes
puts
raises
reaches
recalls
receives
recommends
reduces
reflects
remains
reports
represents
requires
retains
runs
says
seeks
seems
sees
sells
serves
sets
shows
sounds
specializes
spends
stands
starts
stems
succeeds
suggests
supports
takes
tells
tends
thinks
tracks
tries
turns
uses
values
wants
warns
works
writes
