# Supplementary material
Source: ML conference proceedings conference paper supplement (https://aclanthology.org/D11-1008)
Supplement: Attachment [file D11-1008.Attachment.gz › EMNLP11_Sangati_Zuidema/BitPar/wordclass/update-indices.perl]

#!/usr/bin/perl -i
###################################################################
###      File: /home/users2/schmid/src/TBProgs/KM/f.perl        ###
###    Author: Helmut Schmid                                    ###
###   Purpose:                                                  ###
###   Created: Mon Jul 25 16:05:39 2005                         ###
###  Modified: Wed Jul 27 08:27:27 2005 (schmid)                ###
### Copyright: Institut fuer maschinelle Sprachverarbeitung     ###
###               Universitaet Stuttgart                        ###
###################################################################

while (<>) {
  if (/<[0-9]*>/) {
    $C++;
    s/<[0-9]*>/<$C>/;
  }
  print;
}
