# Supplementary material
Source: ML conference proceedings conference paper supplement (https://aclanthology.org/D11-1008)
Supplement: Attachment [file D11-1008.Attachment.gz › EMNLP11_Sangati_Zuidema/fragments_approxFreq.txt]

(DT "The")	1
(DT "the")	1
(NN "cat")	1
(NN "dog")	1
(NN "mouse")	1
(NP DT (NN "cat"))	1
(NP DT JJ NN)	1
(NP DT NN)	1
(S (NP (DT "The") (NN "cat")) (VP (VBP "saw") NP))	1
(S (NP (DT "The") (NN "cat")) (VP VBP (NP (DT "the") (NN "dog"))))	1
(S (NP (DT "The") (NN "cat")) (VP VBP NP))	1
(S (NP (DT "The") (NN "mouse")) (VP (VBP "saw") NP))	1
(S (NP (DT "The") (NN "mouse")) (VP VBP (NP (DT "the") (NN "cat"))))	1
(S (NP (DT "The") (NN "mouse")) (VP VBP NP))	1
(S (NP (DT "The") NN) (VP (VBP "ate") (NP (DT "the") NN)))	1
(S (NP (DT "The") NN) (VP (VBP "saw") (NP (DT "the") JJ NN)))	1
(S (NP (DT "The") NN) (VP (VBP "saw") (NP (DT "the") NN)))	1
(S (NP (DT "The") NN) (VP (VBP "saw") NP))	1
(S (NP (DT "The") NN) (VP VBP (NP (DT "the") NN)))	1
(S (NP (DT "The") NN) (VP VBP NP))	1
(S NP (VP (VBP "saw") (NP (DT "the") (NN "cat"))))	1
(S NP (VP (VBP "saw") (NP (DT "the") NN)))	1
(S NP (VP (VBP "saw") NP))	1
(S NP (VP VBP (NP (DT "the") (NN "cat"))))	1
(S NP (VP VBP (NP (DT "the") NN)))	1
