# Supplementary material
Source: ML conference proceedings conference paper supplement (https://aclanthology.org/D11-1008)
Supplement: Attachment [file D11-1008.Attachment.gz › EMNLP11_Sangati_Zuidema/testExample.mrg]

(S (NP (DT The) (NN cat)) (VP (VBP saw) (NP (DT the) (JJ yellow) (NN dog))))
(S (NP (DT The) (JJ yellow) (NN mouse)) (VP (VBP saw) (NP (DT the) (NN cat))))
