# Supplementary material
Source: ML conference proceedings conference paper supplement (https://aclanthology.org/D11-1008)
Supplement: Attachment [file D11-1008.Attachment.gz › EMNLP11_Sangati_Zuidema/treebankExample.mrg]

(S (NP (DT The) (NN cat)) (VP (VBP saw) (NP (DT the) (JJ hungry) (NN dog))))
(S (NP (DT The) (NN cat)) (VP (VBP saw) (NP (DT the) (NN dog))))
(S (NP (DT The) (NN mouse)) (VP (VBP saw) (NP (DT the) (NN cat))))
(S (NP (DT The) (NN mouse)) (VP (VBP saw) (NP (DT the) (JJ yellow) (NN cat))))
(S (NP (DT The) (JJ little) (NN mouse)) (VP (VBP saw) (NP (DT the) (NN cat))))
(S (NP (DT The) (NN cat)) (VP (VBP ate) (NP (DT the) (NN dog))))
(S (NP (DT The) (NN mouse)) (VP (VBP ate) (NP (DT the) (NN cat))))
